# Supplementary material for: Synthesis of novel selenium-containing donors as selenium analogues of diiodo(ethylenedithio)diselenadithiafulvalene (DIETS)Electronic supplementary information (ESI) available: Experimental details. See http://www.rsc.org/suppdata/ob/b4/b406092j/
Source: Royal Society of Chemistry journal article supplement (doi:10.1039/b406092j), 2004-01-01
Supplement: b406092j.doc [file b406092j.doc]

# Supplementary data

*Synthesis of novel selenium-containing donors as selenium analogues of diiodo(ethylenedithio)diselenadithiafulvalene (DIETS)*

**Takashi Shirahata and Tatsuro Imakubo**

*Imakubo Initiative Research Unit, RIKEN, 2-1 Hirosawa, Wako, Saitama 351-0198, Japan.*

*E-mail: imakubo@riken.jp*

**4,5-Ethylenediseleno-[1,3]diselenole-2-thione** **2b**

To a mixture of thione **1** (102 mg , 0.45 mmol) and 1,2-bis(selenocyanato)ethane (129 mg, 0.54 mmol) in dry THF (100 ml) was slowly added LDA (0.40 M, 2.8 ml, 1.1 mmol) at 78 °C during a period of 5 min. The reaction mixture was stirred for 1 h at 78 °C, then quenched by addition of H2O-THF (1 ml, v:v = 1:1) and allowed to warm to room temperature overnight. The solvent was evaporated under reduced pressure and the residue was subjected to column chromatography on silica gel with CS2:*n*-hexane = 4:1. The yellow band on the column was collected, and the solvent was evaporated under reduced pressure to give **2b** (39 mg, 21%) as ocher powder; mp 130 °C; *m/z* (EI, 70 eV): 414 (M for C5H4S78Se80Se3), 370 (MC=S); **H (270 MHz, CDCl3) 3.47 (s, 4H); Elemental analysis: Calc. for C5H4SSe4: C, 14.58; H, 0.98. Found: C, 14.34; H, 0.82%.

**4,5-Ethylenediseleno-[1,3]diselenol-2-one** **2c**

To a mixture of thione **2b** (209 mg, 0.51 mmol) and Hg(OAc)2 (339 mg, 1.1 mmol) in CHCl3 (25 ml) was added AcOH (5 ml), and the mixture was stirred at room temperature for 4.5 h. The reaction mixture was filtered through Celite and washed with CH2Cl2. The filtrate/washings were transferred to a separating funnel and were washed successively with several portions of H2O and saturated aqueous NaHCO3 solution, dried over MgSO4, and then concentrated under reduced pressure. Purification of the residue with silica gel column chromatography by using CH2Cl2 as an eluent gave ketone **2c** (179 mg, 89%) as cream powder; *m/z* (EI, 70 eV): 398 (M for C5H4O78Se80Se3).

**4,5-Methylenediseleno-[1,3]diselenole-2-thione** **3b**

To a mixture of thione **1** (204 mg , 0.90 mmol) and 1,2-bis(selenocyanato)methane (407 mg, 1.8 mmol) in dry THF (50 ml) was slowly added LDA (0.75 M, 3.6 ml, 2.7 mmol) at 95 °C during a period of 20 min. The reaction mixture was stirred for 65 min at 95 °C, then quenched by addition of H2O-THF (1 ml, v:v = 1:1) and allowed to warm to room temperature. The solvent of reaction mixture was evaporated under reduced pressure. The residue was subjected to column chromatography on silica gel with CS2:*n*-hexane = 4:1. The yellow band on the column was collected, and the solvent was evaporated under reduced pressure to give **3b** (122 mg, 34%) as brown crystals; mp 185 °C (decomp.); *m/z* (EI, 70 eV): 400 (M+ for C4H2S78Se80Se3), 356 (M  C=S); **H (270 MHz, CDCl3) 4.89 (s, 2H); Elemental analysis: Calc. for C4H2SSe4: C, 12.16; H, 0.48. Found: C, 12.08; H, 0.46%s.

**4,5-Methylenediseleno-[1,3]diselenol-2-one** **3c**

A similar procedure as for the synthesis of **2c** was employed. The ketone **3c** (60 mg, 0.19 mmol, 59%) was obtained from **3b** (127 mg, 0.32 mmol); yellow-orange powder; *m/z* (EI, 70 eV): 384 (M for C4H2O78Se80Se3).

**4,5-Ethylenediseleno-[1,3]selenothiole-2-selone** **4**

To a solution of **1** (96 mg, 0.42 mmol) in THF (100 ml) at 78 °C was added LDA (0.75 M, 1.2 ml, 0.92 mmol), and the resulting solution was sttired for 1 h at the same temperature. To this reaction mixture, 1,2-bis(selenocyanato)ethane (157 mg, 0.66 mmol) was added in one portion. After 15 min, the mixture was allowed to warm to room temperaure, then the solvent was evaporated under reduced pressure. The residue was subjected to column chromatography on silica gel with CS2. The orange band on the column was collected, and the solvent was evaporated under reduced pressure to give **4** (53 mg, 20%) as purplish-brown crystals; mp 170 °C (decomp.); *m/z* (EI, 70 eV): 414 (M for C5H4S78Se80Se3), 322 (MC=Se); **H (270 MHz, CDCl3) 3.44 (m, 2H), 3.45 (m, 2H); Elemental analysis: Calc. for C5H4SSe4: C, 14.58; H, 0.98. Found: C, 14.59; H, 0.91%.

**2-(5,6-Dihydro-[1,3]diselenolo[4,5-*b*][1,4]diselenin-2-ylidene)-4,5-diiodo-[1,3]dithiole (DIEDSS)**

To a refluxing solution of **5** (154 mg, 0.40 mmol) and **2c** (128 mg, 0.26 mmol) in toluene (20 ml) was added triethyl phosphite (2.8 ml, 16 mmol) and the resulting solution was heated at reflux for 30 min, during which the solution turned to dark orange. After cooling to room temperature, the solvent was evaporated under reduced pressure. The residue was subjected to column chromatography on silica gel with CS2. The reddish-orange band on the column was collected, and the solvent was evaporated under reduced pressure to give **DIEDSS** (113.7 mg, 48%) as orange brown crystals, mp 157 °C (decomp.); *m/z* (EI, 70 eV): 736 (M for C8H4I2S278Se80Se3); **H (270 MHz, CDCl3) 3.37 (s, 4H); Elemental analysis: Calc. for C8H4I2S2Se4: C, 13.09; H, 0.55. Found: C, 13.14; H, 0.53%.

**2-(4,5-Diiodo-[1,3]diselenol-2-ylidene)-5,6-dihydro-[1,3]dithiolo[4,5-*b*][1,4]dioxine (DIEDO-STF)**

This compound was obtained from **6** (372 mg, 0.80 mmol), **7a** (154 mg, 0.80 mmol) and triethyl phosphite (5.0 ml, 29 mmol) in benzene (30 ml) using a similar procedure as for the synthesis of DIEDSS. **DIEDO-STF** (178 mg, 37%): reddish-brown crystals, mp 178 °C (decomp.); *m/z* (EI, 70 eV): 610 (M for C8H4I2O2S280Se2); **H (270 MHz, CDCl3) 4.26 (s, 4H); Elemental analysis: Calc. for C8H4I2O2S2Se2: C, 15.80; H, 0. 66. Found: C, 15.84; H, 0.60%.

**2-(4,5-Diiodo-[1,3]diselenol-2-ylidene)-5,6-dihydro-[1,3]dithiolo[4,5-*b*][1,4]dithiine (DIET-STF)**

This compound was obtained from **6** (100 mg, 0.22 mmol), **7b** (58 mg, 0.26 mmol) and triethyl phosphite (3.7 ml, 21 mmol) in benzene (20 ml) using a similar procedure as for the synthesis of DIEDSS. **DIET-STF** (104 mg, 76%): purplish-brown crystals, mp 175 °C (decomp.); *m/z* (EI, 70 eV): 642 (M for C8H4I2S480Se2); **H (270 MHz, CDCl3) 3.30 (s, 4H); Elemental analysis: Calc. for C8H4I2S4Se2: C, 15.01; H, 0.63. Found: C, 14.96; H, 0.53%.

**2-(4,5-Diiodo-[1,3]diselenol-2-ylidene)-5,6-dihydro-[1,4]diselenino[2,3-*d*][1,3]dithiole (DIEDS-STF)**

This compound was obtained from **6** (100 mg, 0.22 mmol), **7c** (82 mg, 0.26 mmol) and triethyl phosphite (3.7 ml, 21 mmol) in benzene (20 ml) using a similar procedure as for the synthesis of DIEDSS. **DIEDS-STF** (112 mg, 71%): orange-brown crystals, mp 154 °C (decomp.); *m/z* (EI, 70 eV): 736 (M for C8H4I2S278Se80Se3); **H (270 MHz, CDCl3) 3.35 (s, 4H); Elemental analysis: Calc. for C8H4I2S2Se4: C, 13.09; H, 0.55. Found: C, 13.16; H, 0.50%.

**2-(4,5-Diiodo-[1,3]diselenol-2-ylidene)-5,6-dihydro-[1,3]diselenolo[4,5-*b*][1,4]diselenine (DIEDSSe)**

This compound was obtained from **6** (58 mg, 0.12 mmol), **2b** (63 mg, 0.15 mmol) and triethyl phosphite (3.0 ml, 17 mmol) in toluene (10 ml) using a similar procedure as for the synthesis of DIEDSS. **DIEDSSe** (22 mg, 21%): orange red crystals, mp 167 °C (decomp.); *m/z* (EI, 70 eV): 830 (M for C8H4I278Se280Se4); **H (270 MHz, CDCl3) 3.38 (s, 4H); Elemental analysis: Calc. for C8H4I2Se6: C, 11.61; H, 0.49. Found: C, 11.71; H, 0.44%.

**2-(5,6-Dihydro-[1,3]diselenolo[4,5-*b*][1,4]diselenin-2-ylidene)-5,6-dihydro-[1,3]dithiolo[4,5-*b*][1,4]dioxine (SOST)**

This compound was obtained from **2c** (50 mg, 0.13 mmol), **7a** (39 mg, 0.20 mmol) and triethyl phosphite (4.0 ml, 23 mmol) in benzene (10 ml) using a similar procedure as for the synthesis of DIEDSS. **SOST** (47 mg, 69%): orange crystals, mp 209 °C (decomp.); *m/z* (EI, 70 eV): 542 (M for C10H8O2S278Se80Se3); **H (270 MHz, CDCl3) 3.36 (s, 4H, SCH2CH2S), 4.26 (s, 4H, OCH2CH2O); Elemental analysis: Calc. for C10H8O2S2Se4: C, 22.24; H, 1.49. Found: C, 22.26; H, 1.44%.

**2-(5,6-Dihydro-[1,3]diselenolo[4,5-*b*][1,4]diselenin-2-ylidene)-5,6-dihydro-[1,3]diselenolo[4,5-*b*][1,4]dithiine (STSe)**

A suspension of **2b** (49 mg, 0.12 mmol) and **8** (67 mg, 0.22 mmol) in triethyl phosphite (10 ml) was heated at 100 °C for 30 min. After cooling to room temperature, the resulting brown precipitate was collected by filtration and washed successively with ethanol, methanol, acetone and *n*-hexane. The brown powder, which is a mixture of STSe and BETS, was dissolved in CS2 and separated by preparative gel permeation chromatography (GPC) with CS2. **STSe** (22 mg, 21%) was obtained as reddish-purple crystals, mp 280 °C (decomp.); *m/z* (EI, 70 eV): 668 (M for C10H8S278Se280Se4); **H (270 MHz, CDCl3) 3.29 (s, 4H, SCH2CH2S), 3.36 (s, 4H, SeCH2CH2Se); Elemental analysis: Calc. for C10H8S2Se6: C, 18.03; H, 1.21. Found: C, 18.08; H, 1.19%.

**2-(4,5-Dimethyl-[1,3]diselenol-2-ylidene)-5,6-dihydro-[1,3]diselenolo[4,5-*b*][1,4]diselenine (DMEDSSe)**

This compound was obtained from **2c** (194 mg, 0.49 mmol), **9** (203 mg, 0.67 mmol) and triethyl phosphite (8.5 ml, 49 mmol) in toluene (40 ml) using a similar procedure as for the synthesis of DIEDSS. **DMEDSSe** (22 mg, 21%): orange crystals, mp 227 °C (decomp.); m/z (EI, 70 eV): 606 (M for C10H1078Se280Se4); **H (270 MHz, CDCl3) 2.00 (s, 6H, CH3), 3.36 (s, 4H, SeCH2CH2Se); Elemental analysis: Calc. for C10H10Se6: C, 19.89; H, 1.67. Found: C, 19.89; H, 1.55%.
